# Supplementary material for: Long- and Short-Term Temporal Variability in Cloud Condensation Nuclei Spectra in the Southern Great Plains
Source: Copernicus journal article supplement (doi:10.5194/acp-2021-1008), 2021-12-13
Supplement: Supplementary file 1 [file aurtocorr fit coeffs.xlsx]

## Sheet: Sheet1
0.1% ssw
a = 0.4763 (0.3446, 0.608)					fast decay portion
b = 0.03609 (0.001347, 0.07083)					fast decay time constant
c = 0.5473 (0.3696, 0.7249)					slow decay portion
d = 1.106 (0.3529, 1.858)					slow decay time constant
						0.1% SSw	1% ssw	10% ssw
1% ssw					cf	0.48 (0.34, 0.61)	0.46 (0.31, 0.61)	0.39 (-0.09, 0.88)
a = 0.4587 (0.3121, 0.6052)					tf	0.036 (0.001, 0.071)	0.070 (0.027, 0.113)	0.215 (0.026, 0.404)
b = 0.06959 (0.02653, 0.1127)					cs	0.55 (0.37, 0.72)	0.57 (0.38, 0.75)	0.63 (0.15, 1.11)
c = 0.5651 (0.3811, 0.7492)					ts	1.11 (0.35, 1.86)	1.18 (0.39, 1.96)	0.99 (0.08, 1.90)
d = 1.176 (0.3909, 1.961)
10% ssw
a = 0.3943 (-0.08992, 0.8785)
b = 0.2157 (0.02661, 0.4047)
c = 0.6319 (0.1511, 1.113)
d = 0.9895 (0.08311, 1.896)
